# Supplementary material for: Impact of Discrepancies in General and Abdominal Obesity on Major Adverse Cardiac Events
Source: PubMed Central journal article supplement — J Am Heart Assoc. 2019 Sep 4;8(18):e013471. doi: 10.1161/JAHA.119.013471 (PMC6818009; doi:10.1161/jaha.119.013471), 2019-09-04
Supplement: JAH3-8-e013471-s001.pdf [file JAH3-8-e013471-s001.pdf]

# **SUPPLEMENTAL MATERIAL**

**Table S1. Sensitivity analysis on the association of obesity with major adverse cardiovascular events with abdominal obesity defined as 85 or 90 cm or more for men and women, respectively.**

|              |                                     | WC<85 (men) or 90 (women) cm |                                           | WC≥85 (men) or 90 (women) cm              |                               |
|--------------|-------------------------------------|------------------------------|-------------------------------------------|-------------------------------------------|-------------------------------|
|              |                                     | BMI<25.0 kg/m <sup>2</sup>   | BMI≥25.0 kg/m <sup>2</sup>                | BMI<25.0 kg/m <sup>2</sup>                | BMI≥25.0 kg/m <sup>2</sup>    |
|              |                                     | Normal                       | General obesity without abdominal obesity | Abdominal obesity without general obesity | General and abdominal obesity |
| Men          | Major adverse cardiovascular events |                              |                                           |                                           |                               |
|              | Events                              | 2,127                        | 201                                       | 1,231                                     | 1,563                         |
|              | Person-years                        | 444,796                      | 50,267                                    | 189,360                                   | 303,753                       |
|              | aHR (95% CI)                        | 1.00 (reference)             | 1.14 (0.98-1.32)                          | 1.22 (1.14-1.31)                          | 1.21 (1.13-1.29)              |
|              | Myocardial infarction               |                              |                                           |                                           |                               |
|              | Events                              | 583                          | 61                                        | 360                                       | 497                           |
|              | Person-years                        | 444,796                      | 50,267                                    | 189,360                                   | 303,753                       |
|              | aHR (95% CI)                        | 1.00 (reference)             | 1.18 (0.90-1.53)                          | 1.36 (1.19-1.55)                          | 1.38 (1.22-1.56)              |
|              | Stroke                              |                              |                                           |                                           |                               |
| Events       | 1,681                               | 148                          | 948                                       | 1,163                                     |                               |
| Person-years | 444,796                             | 50,267                       | 189,360                                   | 303,753                                   |                               |
| aHR (95% CI) | 1.00 (reference)                    | 1.10 (0.93-1.31)             | 1.17 (1.08-1.27)                          | 1.15 (1.07-1.24)                          |                               |
| Women        | Major adverse cardiovascular events |                              |                                           |                                           |                               |
|              | Events                              | 1,831                        | 704                                       | 79                                        | 451                           |
|              | Person-years                        | 569,666                      | 200,508                                   | 8,888                                     | 76,509                        |
|              | aHR (95% CI)                        | 1.00 (reference)             | 1.04 (0.96-1.14)                          | 1.21 (0.97-1.52)                          | 1.20 (1.08-1.33)              |
|              | Myocardial infarction               |                              |                                           |                                           |                               |
|              | Events                              | 290                          | 121                                       | 13                                        | 85                            |
|              | Person-years                        | 569,666                      | 200,508                                   | 8,888                                     | 76,509                        |
|              | aHR (95% CI)                        | 1.00 (reference)             | 1.16 (0.94-1.44)                          | 1.06 (0.61-1.85)                          | 1.34 (1.05-1.71)              |
|              | Stroke                              |                              |                                           |                                           |                               |
| Events       | 1,640                               | 620                          | 69                                        | 391                                       |                               |
| Person-years | 569,666                             | 200,508                      | 8,888                                     | 76,509                                    |                               |
| aHR (95% CI) | 1.00 (reference)                    | 1.02 (0.93-1.12)             | 1.19 (0.94-1.52)                          | 1.16 (1.04-1.30)                          |                               |

Hazard ratio calculated by Cox proportional hazards regression analysis after adjustments for age, household income, smoking, physical activity, alcohol consumption, and Charlson comorbidity index.

WC, waist circumference; BMI, body mass index; aHR, adjusted hazard ratio; CI, confidence interval.

**Table S2. Sensitivity analysis on the association of general or abdominal obesity only with major adverse cardiovascular events with abdominal obesity defined as 85 or 90 cm or more for men and women, respectively.**

|              |                                     | <b>General obesity without abdominal obesity</b> | <b>Abdominal obesity without general obesity</b> |
|--------------|-------------------------------------|--------------------------------------------------|--------------------------------------------------|
| Men          | Major adverse cardiovascular events |                                                  |                                                  |
|              | Events                              | 201                                              | 1,231                                            |
|              | Person-years                        | 50,267                                           | 189,360                                          |
|              | aHR (95% CI)                        | 1.00 (reference)                                 | 1.07 (0.92-1.24)                                 |
|              | Myocardial infarction               |                                                  |                                                  |
|              | Events                              | 61                                               | 360                                              |
|              | Person-years                        | 50,267                                           | 189,360                                          |
|              | aHR (95% CI)                        | 1.00 (reference)                                 | 1.15 (0.87-1.52)                                 |
|              | Stroke                              |                                                  |                                                  |
| Events       | 148                                 | 948                                              |                                                  |
| Person-years | 50,267                              | 189,360                                          |                                                  |
| aHR (95% CI) | 1.00 (reference)                    | 1.05 (0.88-1.25)                                 |                                                  |
| Women        | Major adverse cardiovascular events |                                                  |                                                  |
|              | Events                              | 704                                              | 79                                               |
|              | Person-years                        | 200,508                                          | 8,888                                            |
|              | aHR (95% CI)                        | 1.00 (reference)                                 | 1.24 (0.98-1.58)                                 |
|              | Myocardial infarction               |                                                  |                                                  |
|              | Events                              | 121                                              | 13                                               |
|              | Person-years                        | 200,508                                          | 8,888                                            |
|              | aHR (95% CI)                        | 1.00 (reference)                                 | 0.94 (0.52-1.69)                                 |
|              | Stroke                              |                                                  |                                                  |
| Events       | 620                                 | 69                                               |                                                  |
| Person-years | 200,508                             | 8,888                                            |                                                  |
| aHR (95% CI) | 1.00 (reference)                    | 1.25 (0.97-1.62)                                 |                                                  |

Hazard ratio calculated by Cox proportional hazards regression analysis after adjustments for age, household income, smoking, physical activity, alcohol consumption, and Charlson comorbidity index.

WC, waist circumference; BMI, body mass index; aHR, adjusted hazard ratio; CI, confidence interval.

Figure S1. The Kaplan-Meier curves for MACE according to the obesity status.

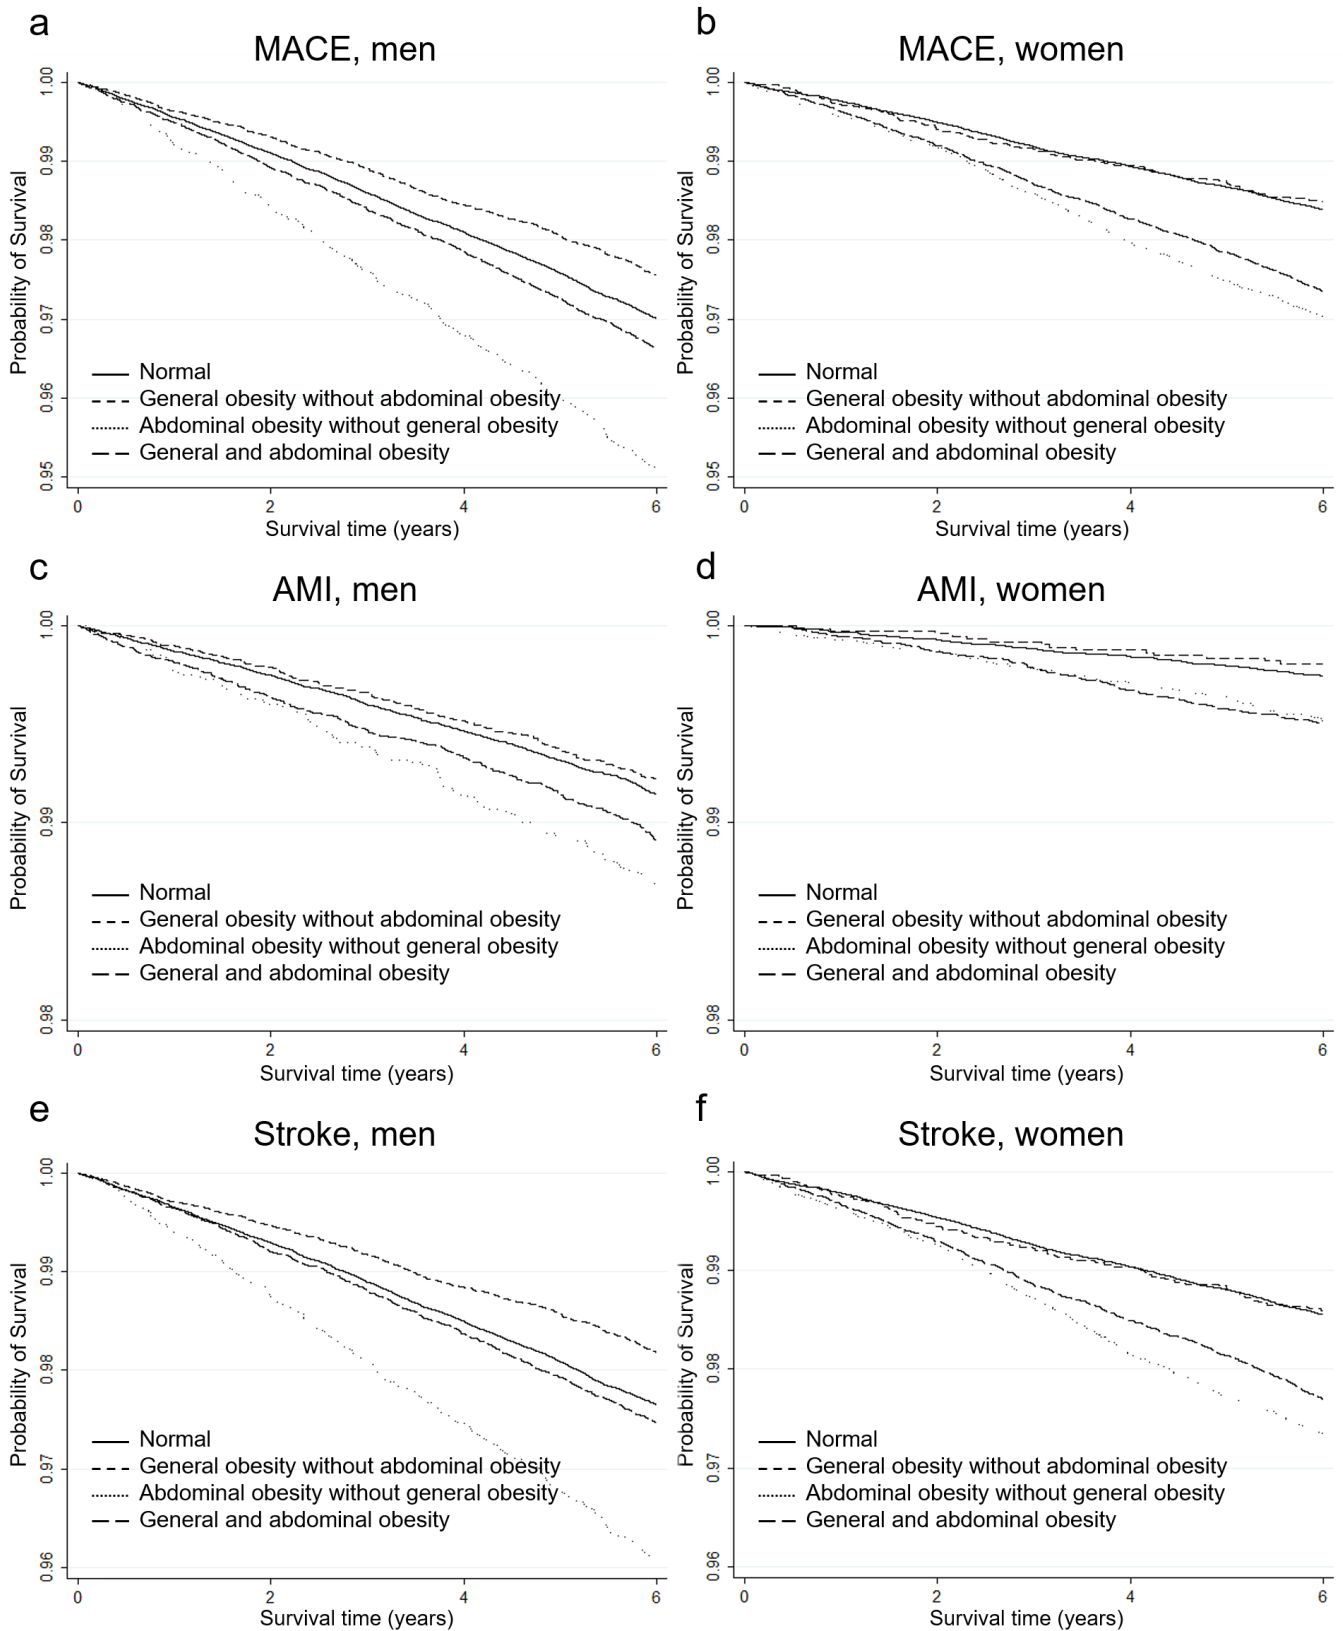

a. The Kaplan-Meier curves for MACE according to the obesity status among men

b. The Kaplan-Meier curves for MACE according to the obesity status among women

c. The Kaplan-Meier curves for AMI according to the obesity status among men

- d. The Kaplan-Meier curves for AMI according to the obesity status among women
- e. The Kaplan-Meier curves for stroke according to the obesity status among men
- f. The Kaplan-Meier curves for stroke according to the obesity status among women

MACE, major adverse cardiovascular events; AMI, acute myocardial infarction
